# Supplementary material for: Enhanced norfloxacin removal by eco-friendly MgFe2O4 modified sugarcane bagasse biochar: adsorption performances and mechanisms
Source: Royal Society of Chemistry journal article supplement (doi:10.1039/d4nj05076b), 2025-01-01
Supplement: d4nj05076b1.pdf [file d4nj05076b1.pdf]

1

## Supplementary information

2 **Enhanced norfloxacin removal by eco-friendly  $\text{MgFe}_2\text{O}_4$  modified sugarcane**

3 **bagasse biochar: Adsorption performances and mechanisms**

4 Yan He\*, Tong Liu, Yuehua Deng

5 College of Geology and Environment, Xi'an University of Science and Technology,

6 Xi'an 710054, China.

7 \*Corresponding Author: [nkheyang@163.com](mailto:nkheyang@163.com) (Yan He)

8

9 **Test S1.** The equations and parameters of adsorption kinetic, isotherm and thermodynamic models.

10 Pseudo-first-order (Eq. (1)), pseudo-second-order (Eq. (2)) and intra-particle diffusion (Eq.  
11 (3)) models were used to fit the kinetic data. Langmuir (Eq. (4) and Eq. (5)), Freundlich (Eq. (6)),  
12 Temkin (Eq. (7)) and Dubinin-Radushkevich isotherm models (Eq. (8), Eq. (9) and Eq. (10)) were  
13 applied to fit the isothermal data. The thermodynamic parameters were calculated by the following  
14 Eq. (11) and Eq. (12).

15 
$$Q_t = Q_e(1 - e^{-k_1 t}) \quad (1)$$

16 
$$Q_t = \frac{Q_e^2 k_2 t}{1 + Q_e k_2 t} \quad (2)$$

17 
$$Q_t = k_i t^{1/2} + C_i \quad (3)$$

18 
$$Q_e = \frac{Q_m K_L C_e}{1 + K_L C_e} \quad (4)$$

19 
$$RL = \frac{1}{1 + K_L C_0} \quad (5)$$

20 
$$Q_e = K_F C_e^{1/n} \quad (6)$$

21 
$$Q_e = \frac{RT}{B_T} \ln(K_T C_e) \quad (7)$$

22 
$$Q_e = Q_m e^{-K_D \varepsilon^2} \quad (8)$$

23 
$$\varepsilon = RT \ln(1 + 1/C_e) \quad (9)$$

24 
$$E = (2K_D)^{-0.5} \quad (10)$$

25 
$$\Delta G^0 = \Delta H^0 - T \Delta S^0 \quad (11)$$

26 
$$\ln \frac{Q_e}{C_e} = \frac{\Delta S^0}{R} - \frac{\Delta H^0}{RT} \quad (12)$$

27 where  $Q_t$  (mg/g) and  $Q_e$ (mg/g) are the adsorption amount at time  $t$  (min) and equilibrium,  
28 respectively;  $k_1$  (1/min),  $k_2$  (g/(mg·min)) and  $k_i$  (mg/g·min<sup>1/2</sup>) represent the rate constants of pseudo-  
29 first-order, pseudo-second-order and intraparticle diffusion models, respectively;  $C_i$  (mg/g) is  
30 related to the thickness of the boundary layer;  $C_e$  (mg/L) is the adsorption equilibrium concentration;  
31  $Q_m$  (mg/g) is the maximum adsorption capacity;  $K_L$  (L/mg) is the Langmuir equilibrium constant;

32  $R_L$  is dimensionless separation factor;  $K_F$  ( $\text{mg/g} \cdot (\text{L/mg})^{1/n}$ ) is the Freundlich equilibrium constant  
 33 and represents the adsorption capacity;  $n$  is the isothermal constant and represents the adsorption  
 34 strength;  $R$  is the gas constant ( $8.314 \text{ J/mol} \cdot \text{K}$ );  $T$  (K) is the absolute temperature;  $B_T$  (kJ/mol) is  
 35 the Temkin constant related to the heat of sorption; and  $K_T$  (L/mg) is the Temkin binding constant;  
 36  $K_D$  ( $\text{mol}^2/\text{J}^2$ ) is the constant related to adsorption energy;  $\epsilon$  is the Polanyi potential;  $E$  (kJ/mol) is the  
 37 adsorption free energy;  $\Delta G^0$  (kJ/mol),  $\Delta H^0$  (kJ/mol) and  $\Delta S^0$  (kJ/(mol·K)) are the changes in Gibbs  
 38 free energy, enthalpy and entropy, respectively.

39

40 **Test S2.** The calculation process of ionization distribution of NOR.

$$41 \quad \text{NOR}^+ (\%) = \frac{(10^{(-\text{pH})})^2}{(10^{(-\text{pH})})^2 + 10^{(-\text{pK}_{a1})} \times 10^{(-\text{pH})} + 10^{(-\text{pK}_{a1})} \times 10^{(-\text{pK}_{a2})}} \times 100 \quad (13)$$

$$42 \quad \text{NOR}^\pm (\%) = \frac{10^{(-\text{pK}_{a1})} \times 10^{(-\text{pH})}}{(10^{(-\text{pH})})^2 + 10^{(-\text{pK}_{a1})} \times 10^{(-\text{pH})} + 10^{(-\text{pK}_{a1})} \times 10^{(-\text{pK}_{a2})}} \times 100 \quad (14)$$

$$43 \quad \text{NOR}^- (\%) = \frac{10^{(-\text{pK}_{a1})} \times 10^{(-\text{pK}_{a2})}}{(10^{(-\text{pH})})^2 + 10^{(-\text{pK}_{a1})} \times 10^{(-\text{pH})} + 10^{(-\text{pK}_{a1})} \times 10^{(-\text{pK}_{a2})}} \times 100 \quad (15)$$

44

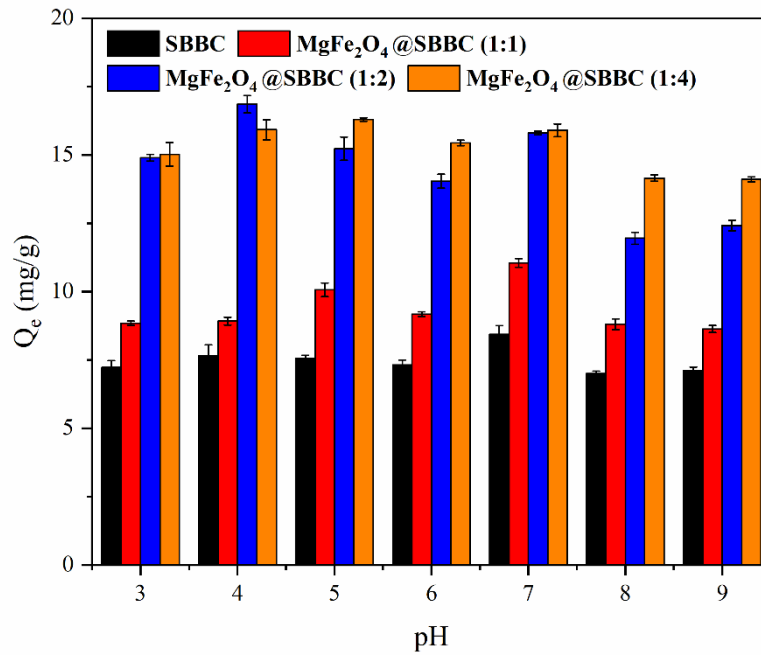

45

46

**Fig. S1.** NOR adsorption capacities of different biochar materials.

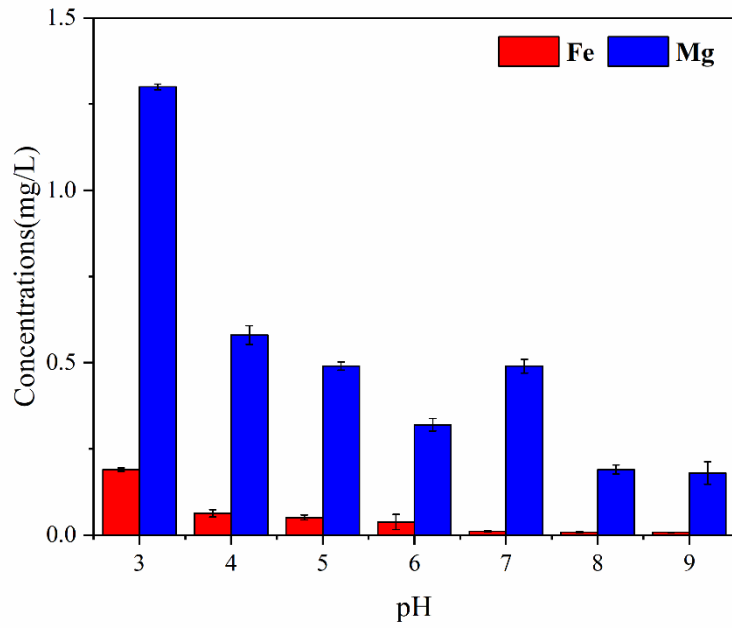

47

48

Fig. S2. Metal leaching concentrations at different pH conditions.

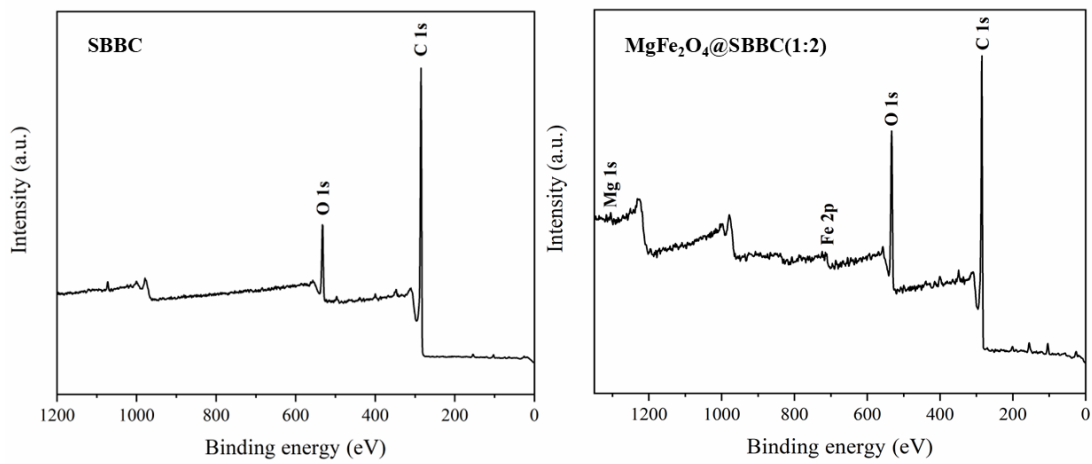

49

50

51

Fig. S3. XPS survey spectra of SBBC and MgFe<sub>2</sub>O<sub>4</sub>@SBBC(1:2).

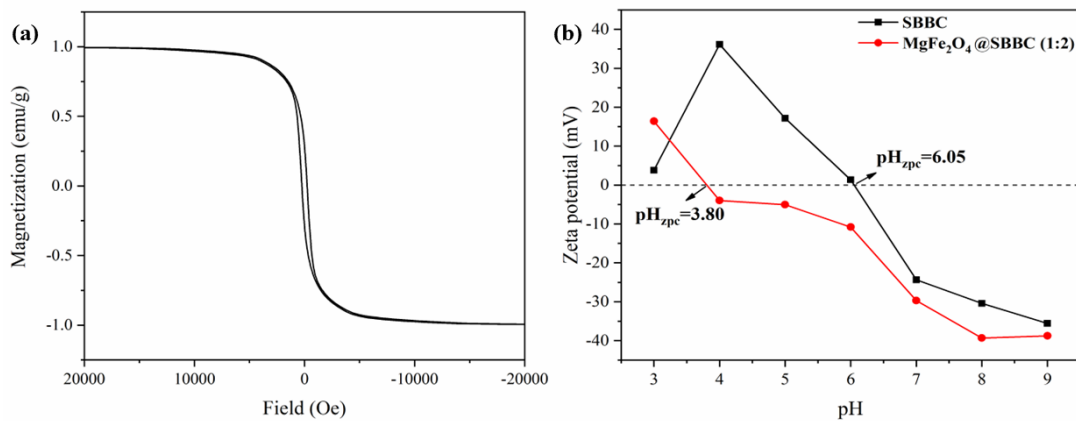

52

53

54

Fig. S4. Magnetic hysteresis curve of MgFe<sub>2</sub>O<sub>4</sub>@SBBC(1:2) (a) and zeta potentials of SBBC and MgFe<sub>2</sub>O<sub>4</sub>@SBBC(1:2) (b).

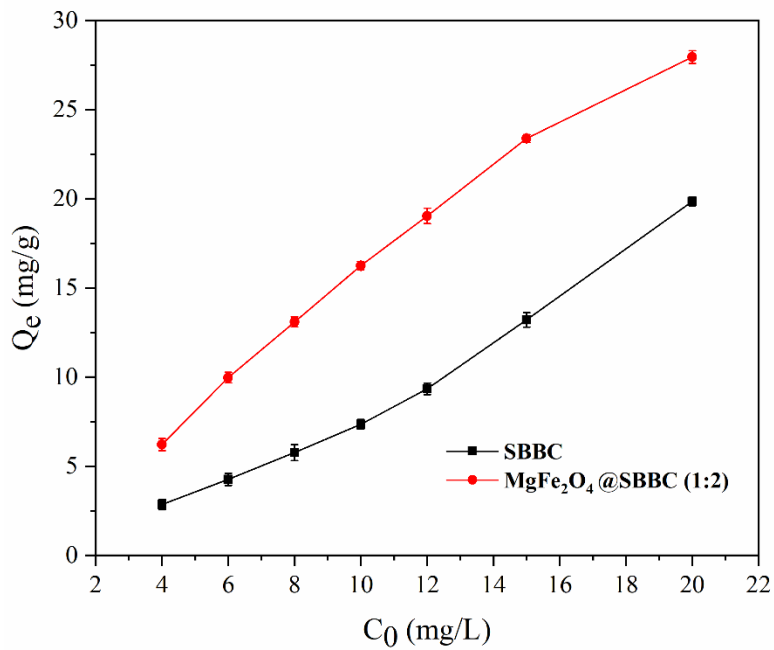

55  
56  
57  
58

**Fig. S5.** Effect of initial concentrations on the NOR adsorption onto SBBC and  $MgFe_2O_4@SBBC(1:2)$ .

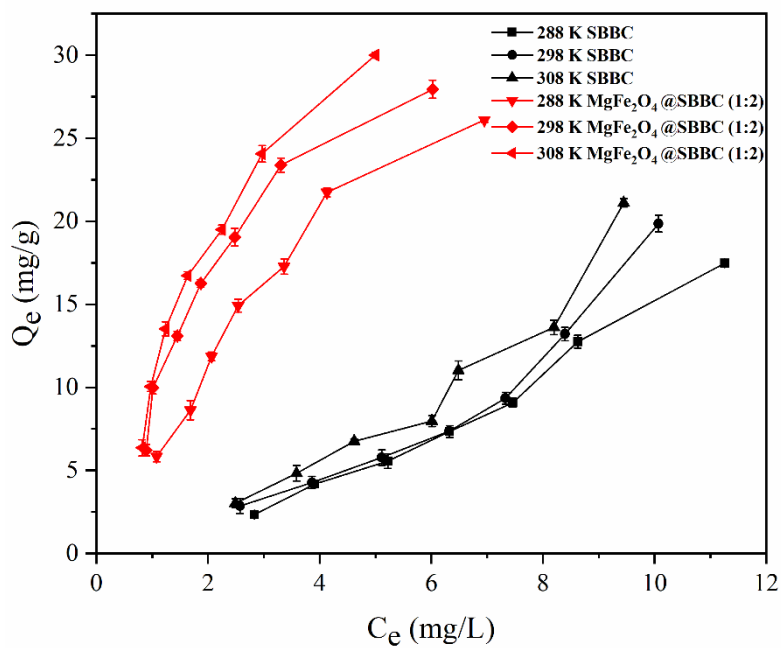

59  
60

**Fig. S6.** Effect of temperature on the NOR adsorption onto SBBC and  $MgFe_2O_4@SBBC(1:2)$ .

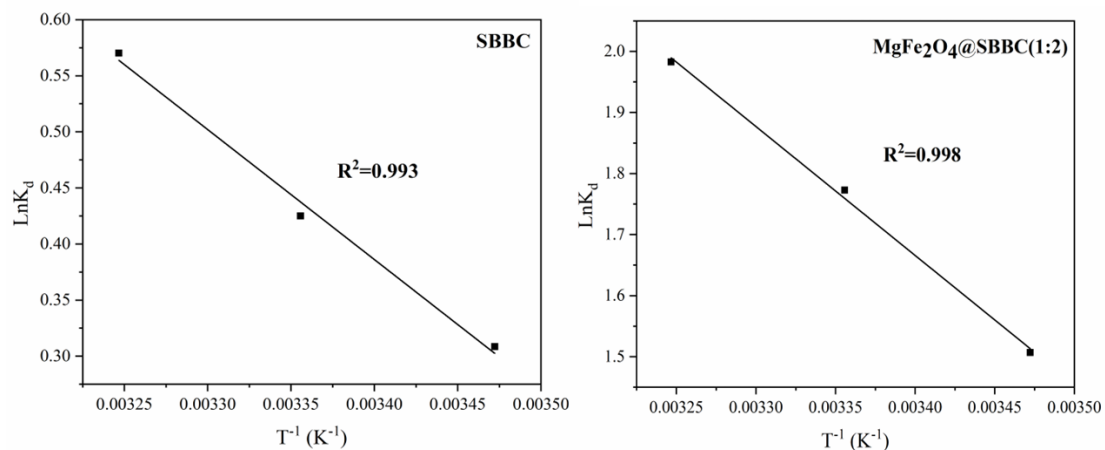

61

62 **Fig. S7.** Thermodynamic studies of NOR adsorption on SBBC and  $\text{MgFe}_2\text{O}_4@SBBC(1:2)$ .

63

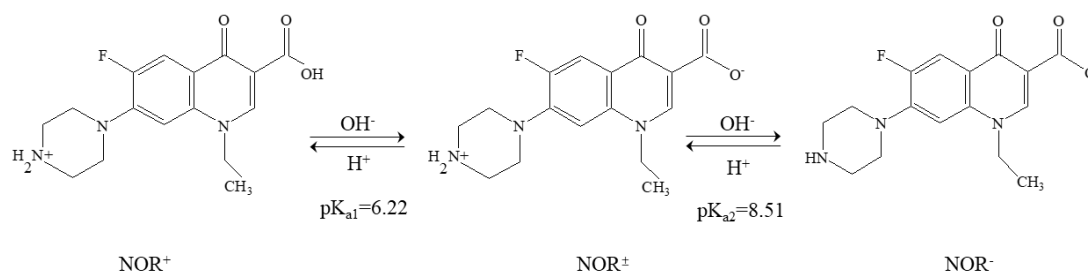

64

65 **Fig. S8.** Chemical speciation of NOR in aqueous solution.

66

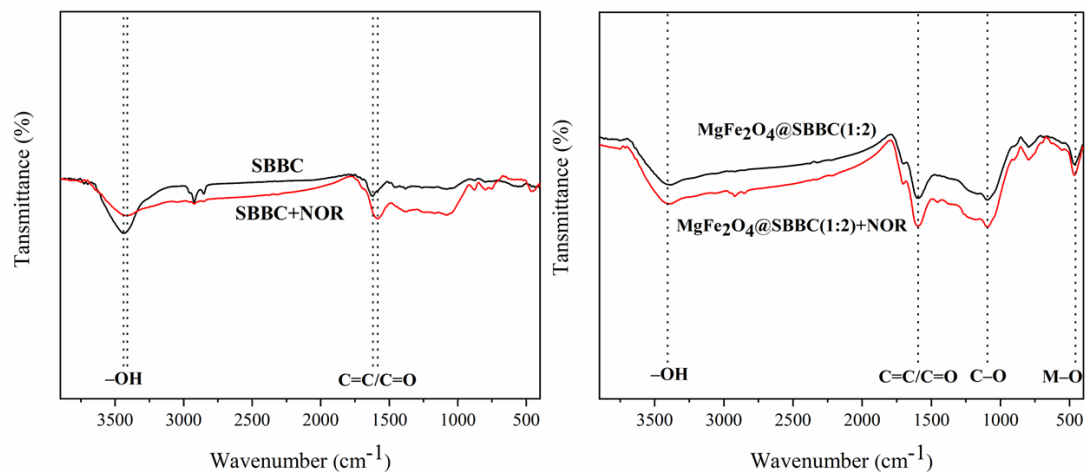

67

68 **Fig. S9.** FTIR spectra of SBBC and  $\text{MgFe}_2\text{O}_4@SBBC(1:2)$  before and after adsorption.

69

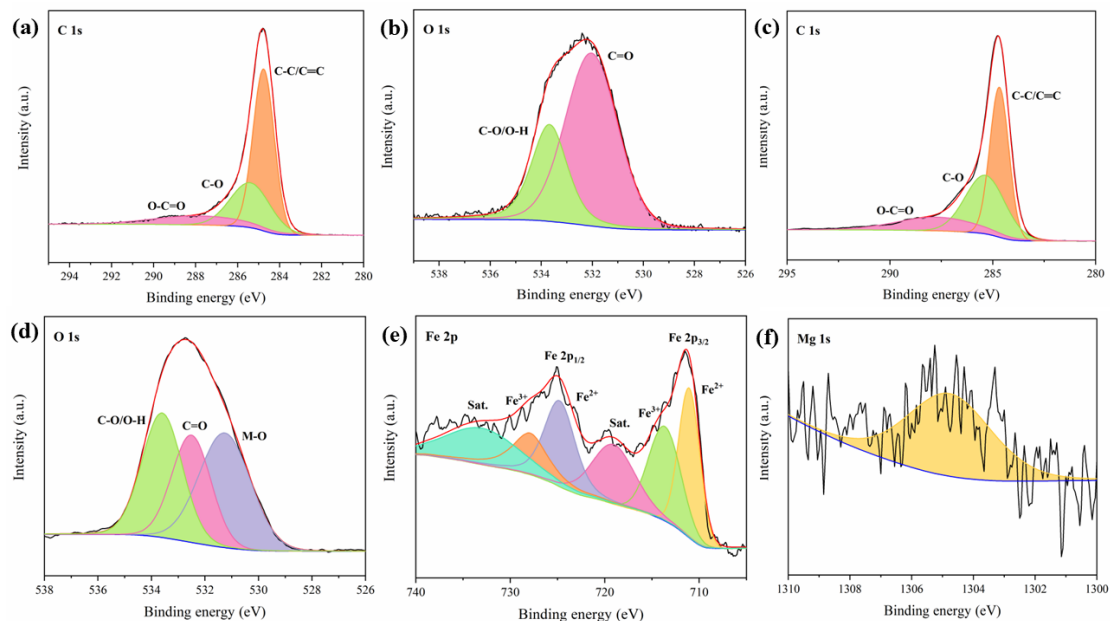

70  
71  
72  
73  
74

**Fig. S10.** XPS spectra C 1s and O 1s of SBBC (a, b) and C 1s, O 1s, Fe 2p and Mg 1s of  $\text{MgFe}_2\text{O}_4@\text{SBBC}(1:2)$  (c–f) after adsorption.

75 **Table S1.**  $S_{\text{BET}}$ ,  $V_p$ , and  $D_p$  values of SBBC and  $\text{MgFe}_2\text{O}_4@\text{SBBC}(1:2)$  after adsorption.

| Sample                                          | $S_{\text{BET}}$ ( $\text{m}^2/\text{g}$ ) | $V_p$ ( $\text{cm}^3/\text{g}$ ) | $D_p$ (nm) |
|-------------------------------------------------|--------------------------------------------|----------------------------------|------------|
| SBBC+NOR                                        | 90                                         | 0.09                             | 3.98       |
| $\text{MgFe}_2\text{O}_4@\text{SBBC}(1:2)$ +NOR | 196                                        | 0.14                             | 2.76       |

76

77 **Table S2.** Summary of the peak area ratio of C 1s and O 1s of SBBC before and after adsorption.

| Binding energy (eV) | 284.6       | 285.8   | 288.5     |
|---------------------|-------------|---------|-----------|
| Functional groups   | C–C/C=C (%) | C–O (%) | O–C=O (%) |
| SBBC                | 60.8        | 25.3    | 13.9      |
| SBBC+NOR            | 56.5        | 29.6    | 13.9      |

78

| Binding energy (eV) | 532.0   | 533.6     |
|---------------------|---------|-----------|
| Functional groups   | C–O (%) | O–C=O (%) |
| SBBC                | 64.0    | 36.0      |
| SBBC+NOR            | 70.0    | 30.0      |

79

80 **Table S3.** Summary of the peak area ratio of C 1s, O 1s, and Fe 2p of  $\text{MgFe}_2\text{O}_4@\text{SBBC}(1:2)$  before  
81 and after adsorption.

| Binding energy (eV)                             | 284.6       | 285.8   | 288.5     |
|-------------------------------------------------|-------------|---------|-----------|
| Functional groups                               | C–C/C=C (%) | C–O (%) | O–C=O (%) |
| $\text{MgFe}_2\text{O}_4@\text{SBBC}(1:2)$      | 62.8        | 19.9    | 17.3      |
| $\text{MgFe}_2\text{O}_4@\text{SBBC}(1:2)$ +NOR | 45.1        | 36.8    | 18.1      |

82

| Binding energy (eV) | 531.3 | 532.5 | 533.6 |
|---------------------|-------|-------|-------|
|---------------------|-------|-------|-------|

| Functional groups                               | M–O (%) | C=O (%) | C–O/O–H (%) |
|-------------------------------------------------|---------|---------|-------------|
| MgFe <sub>2</sub> O <sub>4</sub> @SBBC(1:2)     | 36.9    | 36.1    | 27.0        |
| MgFe <sub>2</sub> O <sub>4</sub> @SBBC(1:2)+NOR | 38.7    | 27.5    | 33.8        |

83

| Binding energy (eV)                             | 711.4, 724.5         | 713.5, 726.0         |
|-------------------------------------------------|----------------------|----------------------|
| Valence state                                   | Fe <sup>2+</sup> (%) | Fe <sup>3+</sup> (%) |
| MgFe <sub>2</sub> O <sub>4</sub> @SBBC(1:2)     | 45.5                 | 26.3                 |
| MgFe <sub>2</sub> O <sub>4</sub> @SBBC(1:2)+NOR | 33.6                 | 29.4                 |

84
